# Supplementary material for: EULAR points to consider for minimal reporting requirements in synovial tissue research in rheumatology
Source: HighWire-hosted journal article supplement (doi:10.1136/annrheumdis-2021-221875), 2022-02-24
Supplement: annrheumdis-2021-221875supp001_data_supplement.pdf [file annrheumdis-2021-221875supp001_data_supplement.pdf]

**Supplementary Text S1.**

Checklist adapted from the Points to Consider for dissemination to journal editors.

**1. Biopsy Procedure**

|                                                                                        |   |   |   |
|----------------------------------------------------------------------------------------|---|---|---|
| -Exclusion criteria for biopsy are defined                                             | Y | / | N |
| -Target joint(s) and recess are described                                              | Y | / | N |
| -Intra-articular steroids in the previous 4 weeks or during the procedure are reported | Y | / | N |
| -Technique used (type and size of biopsy retrieval device) is described                | Y | / | N |
| -Machine/probe for ultrasound guided biopsies, arthroscopic equipment is outlined      | Y | / | N |
| -Adverse events are reported                                                           | Y | / | N |
| -Operator's experience and training                                                    | Y | / | N |

**2. Study design**

|                                                       |   |   |   |
|-------------------------------------------------------|---|---|---|
| -Inclusion criteria are described                     | Y | / | N |
| -Patient's characteristics are outlined               | Y | / | N |
| -Treatments received by the participants are reported | Y | / | N |

**3. Patients' characteristics**

|                                           |   |   |   |
|-------------------------------------------|---|---|---|
| -Disease activity measures are reported   | Y | / | N |
| -Disease stage and duration are presented | Y | / | N |
| -Treatments are described                 | Y | / | N |

**4. Imaging characteristics**

|                                         |   |   |   |
|-----------------------------------------|---|---|---|
| -Clinical aspect of the biopsied joints | Y | / | N |
| -US features for US guided Biopsy       | Y | / | N |
| -Radiographic features when available   | Y | / | N |

**5. Tissue handling**

|                                               |   |   |   |
|-----------------------------------------------|---|---|---|
| -Handling and processing methods are detailed | Y | / | N |
| -Numbers and size of fragments are reported   | Y | / | N |
| -Allocation to each analytic is described     | Y | / | N |

**6. Quality control**

|                              |   |   |   |
|------------------------------|---|---|---|
| -Methods of GC               | Y | / | N |
| -Results of QC               | Y | / | N |
| -Percentage of graded tissue | Y | / | N |

**7. Histopathological analysis**

|                                                                                           |   |   |   |
|-------------------------------------------------------------------------------------------|---|---|---|
| -Representative images are presented                                                      | Y | / | N |
| -Scoring system is cited and citation refers to original validated scoring publication    | Y | / | N |
| -Digital analysis software (including version numbers of platforms used) is cited         | Y | / | N |
| -Immunohistological staining protocol (including antibody sources and clones) is reported | Y | / | N |
| -Area assessed and sampling strategy are detailed                                         | Y | / | N |
| -Number of observers and intra- and inter-observer variability is presented               | Y | / | N |

**8. Transcriptomics**

|                                                       |   |   |   |
|-------------------------------------------------------|---|---|---|
| -Methods of extraction and quantification are defined | Y | / | N |
| -Purity, quantity and quality of DNA/RNA are reported | Y | / | N |

**9. Single cell technologies**

|                                                      |   |   |   |
|------------------------------------------------------|---|---|---|
| -Methods of tissue or cell preservation are detailed | Y | / | N |
| -Methods of tissue dissociation are presented        | Y | / | N |

---

|                                                                                                                            |   |   |   |
|----------------------------------------------------------------------------------------------------------------------------|---|---|---|
| -Percentage of viable cells is described                                                                                   | Y | / | N |
| -Percentage of mitochondrial gene expression seen in the sequenced cells and the threshold chosen for analysis is reported | Y | / | N |
| -If sorting is used, the strategy used and purity of sorted cells is detailed                                              | Y | / | N |
